# Supplementary material
Source: publisher site journal article supplement (https://www.dovepress.com/article/547225)
Supplement: Supplementary file 1 [file 547225_Supplementary%20file%20on%20tables.docx]

Table S1 Scoring method of the FACT-Hep (V4.0)

| Domains/Subscales | Number  of items | Scores  range | Scoring method  (sum of items scores) |
| --- | --- | --- | --- |
| Physical Well-being（PWB） | 7 | 0-28 | GP1+GP2+GP3+GP4+GP5+GP6+GP7 |
| Social / Family Well-being(SFWB) | 7 | 0-28 | GS1+GS2+GS3+GS4+GS5+GS6+GS7 |
| Emotional Well-being（EWB） | 6 | 0-24 | GE1+GE2+GE3+GE4+GE5+GE6 |
| Functioning Well-being（FWB） | 7 | 0-28 | GF1+GF2+GF3+GF4+GF5+GF6+GF7 |
| FACT-G | 27 | 0-108 | PWB+SWB+EWB+FWB |
| Additional Concerns- (HCC)* | 18 | 0-72 | C1+C2+…+Hep8 |
| Overall Scales (Total) | 45 | 0-180 | PWB+SWB+EWB+FWB+HCC |
| Trial Outcome index（TOI） | 32 | 0-128 | PWB+FWB+HCC |

Table S2 Scoring method of the QLICP-LI(V2.0)

| Domains/Subscales |  | Number  of items | Scores  range | Scoring method  (sum of items scores) |
| --- | --- | --- | --- | --- |
| Physical function | PHD | 8 | 8-40 | GPH1+GPH2+…+GPH8 |
| Psychological function | PSD | 9 | 9-45 | GPS1+GPS2+…+GPS9 |
| Social function | SOD | 8 | 8-40 | GSO1+GSO2+…+GSO8 |
| Common Symptoms/Side-effects | SSD | 7 | 7-35 | GSS1+GSS2+…+GSS7 |
| General module QLICP-GM | CGD | 32 | 32-160 | PHD+PSD+SSD+SOD |
| Specific module of HCC | SPD | 12 | 12-60 | SLI1+SLI2+…+SLI12 |
| Overall instrument | TOT | 44 | 44-220 | PHD+PSD+SSD+SOD+SPD |

Table S3 The characteristics of the sample with Hepatocellular carcinoma (n=114)

| Characteristics | Categories | n (%) | Characteristics | Categories | n (%) |
| --- | --- | --- | --- | --- | --- |
| Sex | Male | 92(80.7) | Economic status | Poor | 47(41.2) |
| Female | 22 (19.3) | Moderate | 64 (56.1) |
| Marriage | Married | 110 (96.5) |  | Well | 3 (2.6) |
|  | Others | 4 (3.5) | Treatment | surgey | 16(14.0) |
| Career | Worker | 14 (12.3) |  | chemotherapy | 5(4.4) |
|  | Farmer | 41(36) |  | Minimally invasive | 69(69.5) |
|  | Teacher | 4 (3.5) |  | Other | 24(21.0) |
|  | Public servants | 4 (4.4) |  |  |  |
|  | Business owner | 7 (6.1) |  |  |  |
|  | Others | 43 (37.7) |  |  |  |
| Education | Primary school | 37(32.5) |  |  |  |
|  | Junior high school | 44(38.6) |  |  |  |
|  | High school | 20(17.5) |  |  |  |
|  | Junior college | 13 (11.4) |  |  |  |
| Insurance | Self-paid | 8 (7.0) |  |  |  |
|  | Public insurance | 106 (93.0) |  |  |  |
